# Supplementary material for: Methanogenesis from Mineral Carbonates, a Potential Indicator for Life on Mars
Source: MDPI journal article supplement (doi:10.3390/geosciences12030138), 2022-03-16
Supplement: s1 [file s1]

## Supplementary Information.

**Table S1.** Mineral media composition per litre.

| Reagent                                    | Chemical Formula                                     | Concentration (g/L) |
|--------------------------------------------|------------------------------------------------------|---------------------|
| Potassium dihydrogen phosphate             | $\text{KH}_2\text{PO}_4$                             | 0.27                |
| Disodium hydrogen phosphate dodecahydrate  | $\text{Na}_2\text{HPO}_4 \cdot 12\text{H}_2\text{O}$ | 1.12                |
| Ammonium chloride                          | $\text{NH}_4\text{Cl}$                               | 0.53                |
| Calcium chloride dihydrate                 | $\text{CaCl}_2 \cdot 2\text{H}_2\text{O}$            | 0.075               |
| Magnesium chloride hexahydrate             | $\text{MgCl}_2 \cdot 6\text{H}_2\text{O}$            | 0.10                |
| Iron(II) chloride tetrahydrate             | $\text{FeCl}_2 \cdot 4\text{H}_2\text{O}$            | 0.02                |
| Resazurin (oxygen indicator)               |                                                      | 0.001               |
| Disodium sulfide                           | $\text{Na}_2\text{S} \cdot 9\text{H}_2\text{O}$      | 0.1                 |
| Stock solution of trace elements (Table 2) |                                                      | 10 ml               |

**Table S2.** Trace element solution composition per litre.

| Reagent                         | Chemical Formula                                    | Concentration (g/L) |
|---------------------------------|-----------------------------------------------------|---------------------|
| Manganese chloride tetrahydrate | $\text{MnCl}_2 \cdot 4\text{H}_2\text{O}$           | 0.05                |
| Boric acid                      | $\text{H}_3\text{BO}_3$                             | 0.005               |
| Zinc chloride                   | $\text{ZnCl}_2$                                     | 0.005               |
| Copper chloride                 | $\text{CuCl}_2$                                     | 0.003               |
| Disodium molybdate dihydrate    | $\text{Na}_2\text{MoO}_4 \cdot 2\text{H}_2\text{O}$ | 0.001               |
| Cobalt chloride hexahydrate     | $\text{CoCl}_2 \cdot 6\text{H}_2\text{O}$           | 0.1                 |
| Nickel chloride hexahydrate     | $\text{NiCl}_2 \cdot 6\text{H}_2\text{O}$           | 0.01                |
| Disodium selenite               | $\text{Na}_2\text{SeO}_3$                           | 0.005               |
| Disodium tungstate              | $\text{Na}_2\text{WO}_4 \cdot 2\text{H}_2\text{O}$  | 0.002               |

**Table S3.** Site locations and descriptions.

| Site                     | Short name | Type  | Location           |
|--------------------------|------------|-------|--------------------|
| Harpur Hill, Buxton      | B          | Lime  | 52.2351, -1.91714  |
| Horton Quarry, Horton    | H          | Lime  | 54.14658, -2.30414 |
| Tarmac, Grassington      | T          | Lime  | 54.05422, -2.03002 |
| Ancient lime kiln 1      | LK1        | Lime  | 54.07802, -2.06583 |
| Ancient lime kiln 2      | LK2        | Lime  | 54.07775, -2.06705 |
| Ancient lime kiln 3      | LK3        | Lime  | 54.07802, -2.07179 |
| Ancient lime kiln 4      | LK4        | Lime  | 54.07999, -2.07883 |
| Ancient lime kiln 5      | LK5        | Lime  | 54.07855, -2.0776  |
| Consett Stream, Consett  | CS         | Steel | 54.85391, -1.862   |
| Consett Wetland, Consett | CW         | Steel | 54.83725, -1.85649 |
| Redcar                   | RC         | Steel | 54.61253, -1.08952 |
| Tata, Scunthorpe         | SC         | Steel | 53.57808, -0.59291 |

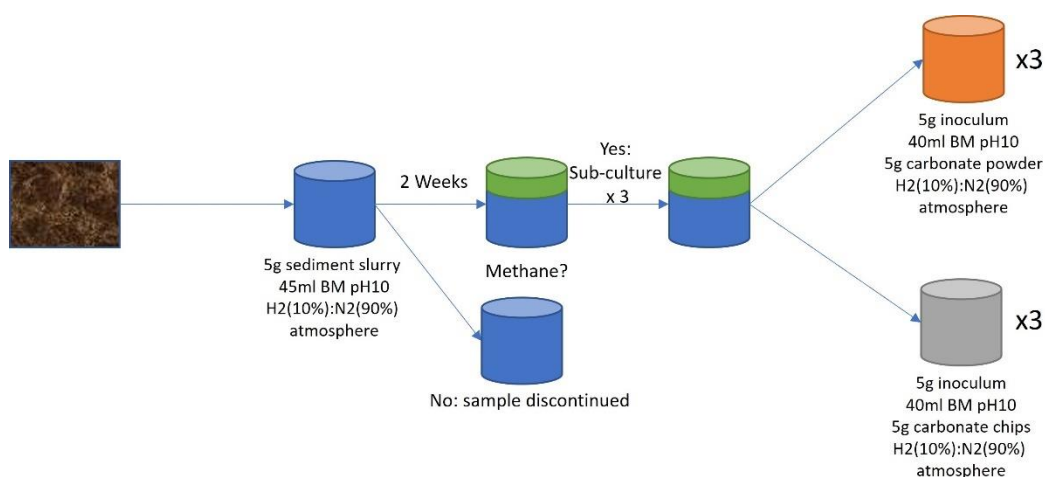

**Figure S1.** Overall scheme of microcosm development. In control experiments, 5ml of BM was added in place of 5g of inoculum.

**Table S4.** Mean production of methane by soil and leachate type over 42 day incubation.

| Soil origin | Leachate origin      | Methane produced (mmol) |       |
|-------------|----------------------|-------------------------|-------|
|             |                      | Carbon source           |       |
|             |                      | Powder                  | Chips |
| B           | Lime                 | 0.22                    | 0.13  |
| H           | Lime                 | 0.37                    | 0.20  |
| T           | Lime                 | 0.18                    | 0.17  |
| LK1         | Lime                 | 0.38                    | 0.18  |
| LK2         | Lime                 | 0.23                    | 0.12  |
| LK3         | Lime                 | 0.38                    | 0.23  |
| LK4         | Lime                 | 0.27                    | 0.25  |
| LK5         | Lime                 | 0.45                    | 0.16  |
| CW          | Steel slag           | 0.49                    | 0.48  |
| CS          | Steel slag           | 0.47                    | 0.47  |
| RC          | Steel slag           | 0.48                    | 0.49  |
| SC          | Steel slag           | 0.45                    | 0.48  |
| -           | Uninoculated control | 0.00                    | 0.00  |

**Table S5.** Stoichiometric calculations of methane production and hydrogen consumption assuming the reduction of carbon dioxide to methane as  $\text{CO}_2 + 4 \text{H}_2 \rightarrow \text{CH}_4 + 2 \text{H}_2\text{O}$ .

| Soil origin | Carbonate type | Hydrogen Consumed | mmoles                    |                                |
|-------------|----------------|-------------------|---------------------------|--------------------------------|
|             |                |                   | Methane produced (actual) | Methane produced (theoretical) |
| Lime        | Powder         | 2.60              | 0.31                      | 0.65                           |
| Steel       | Powder         | 3.26              | 0.47                      | 0.82                           |
| Lime        | Marble chips   | 1.76              | 0.18                      | 0.44                           |
| Steel       | Marble chips   | 2.73              | 0.48                      | 0.68                           |

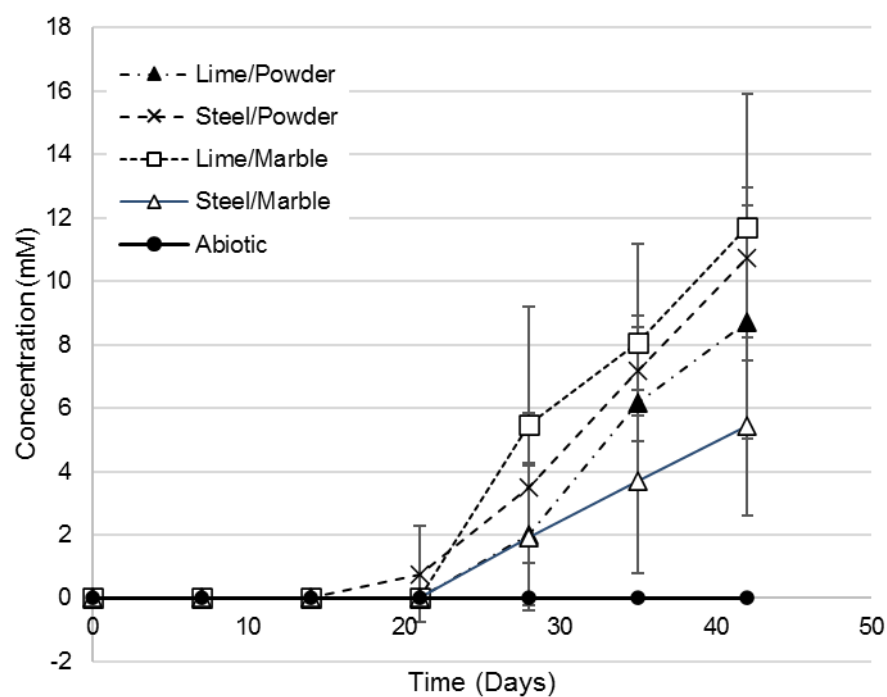

**Figure S2.** The production of acetic acid was observed in microcosms irrespective of lime/steel enrichment or carbonate supplement source.

**Table S6.** Number of OTUs observed within each microcosm Archaeal community.

| Enrichment Type | Site | Number of OTUs<br>Supplement |        |
|-----------------|------|------------------------------|--------|
|                 |      | Powder                       | Marble |
| Lime            | B    | 31                           | 47     |
|                 | H    | 100                          | 210    |
|                 | T    | 108                          | 453    |
|                 | LK1  | 58                           | 450    |
|                 | LK2  | 161                          | 211    |
|                 | LK3  | 87                           | 286    |
|                 | LK4  | 84                           | 236    |
|                 | LK5  | 50                           | 200    |
| Steel           | CS   | 53                           | 25     |
|                 | CW   | 37                           | 33     |
|                 | RC   | 37                           | 42     |
|                 | SC   | 24                           | 16     |

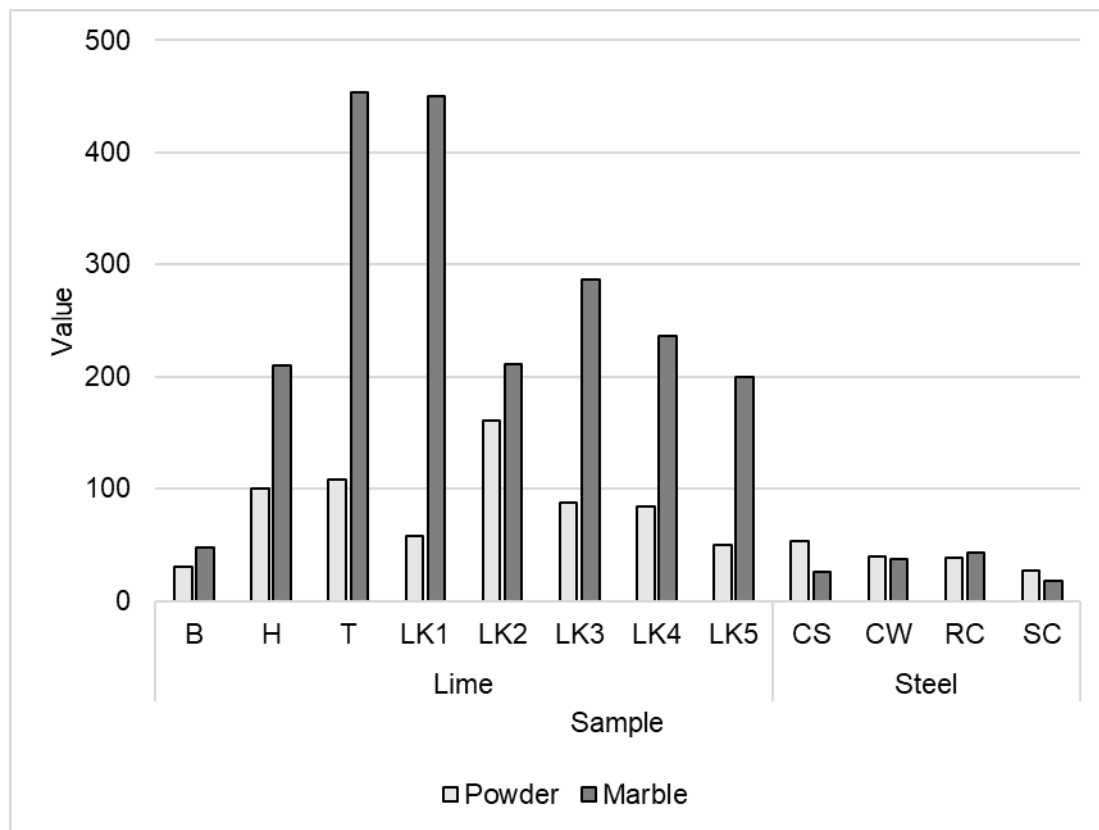

**Figure S3.** Chao1 values for the Archaeal communities present within the lime/steel and calcium carbonate powder/marble chip microcosms.
